# Supplementary material for: MOFs Derived Hetero-ZnO/Fe2O3 Nanoflowers with Enhanced Photocatalytic Performance towards Efficient Degradation of Organic Dyes
Source: MDPI journal article supplement (doi:10.3390/nano11123239), 2021-11-29
Supplement: s1 [file s1]

## Supporting Information

**MOFs derived hetero-ZnO/Fe<sub>2</sub>O<sub>3</sub> nanoflowers with enhanced photocatalytic performance towards efficient degradation of organic dyes**

Fakhr uz Zaman, Bing Xie, Jinyang Zhang, Tianyu Gong, Kai Cui, Linrui Hou,\* Jiali Xu, Zhirou Zhai, Changzhou Yuan\*

School of Materials Science & Engineering, University of Jinan, Jinan 250022, P. R. China

\*Corresponding authors: mse\_houlr@ujn.edu.cn; houlr629@163.com (*Prof. Hou*). mse\_yuancz@ujn.edu.cn (*Prof. Yuan*).

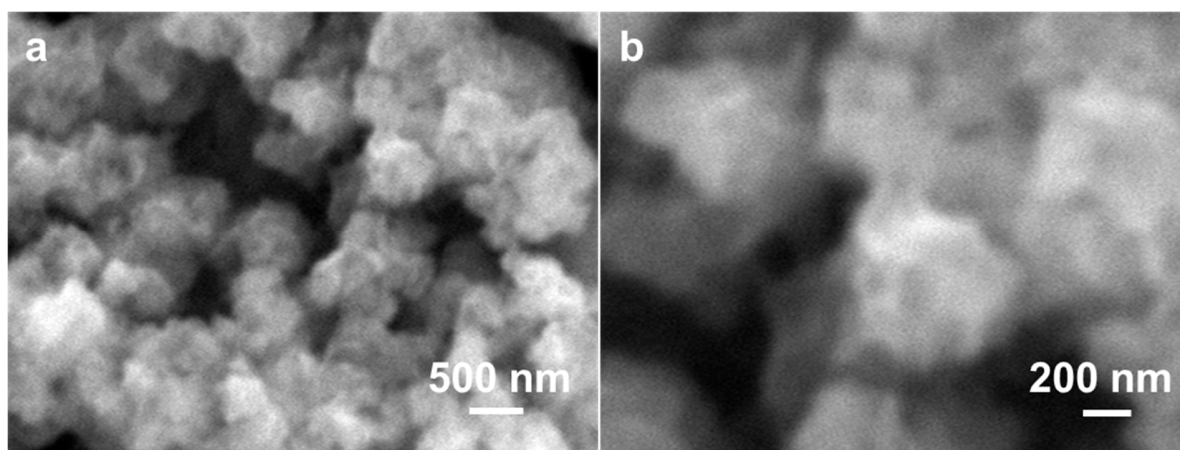

**Figure S1.** SEM of the sample before annealing for synthesizing ZnO /Fe<sub>2</sub>O<sub>3</sub> NFs.

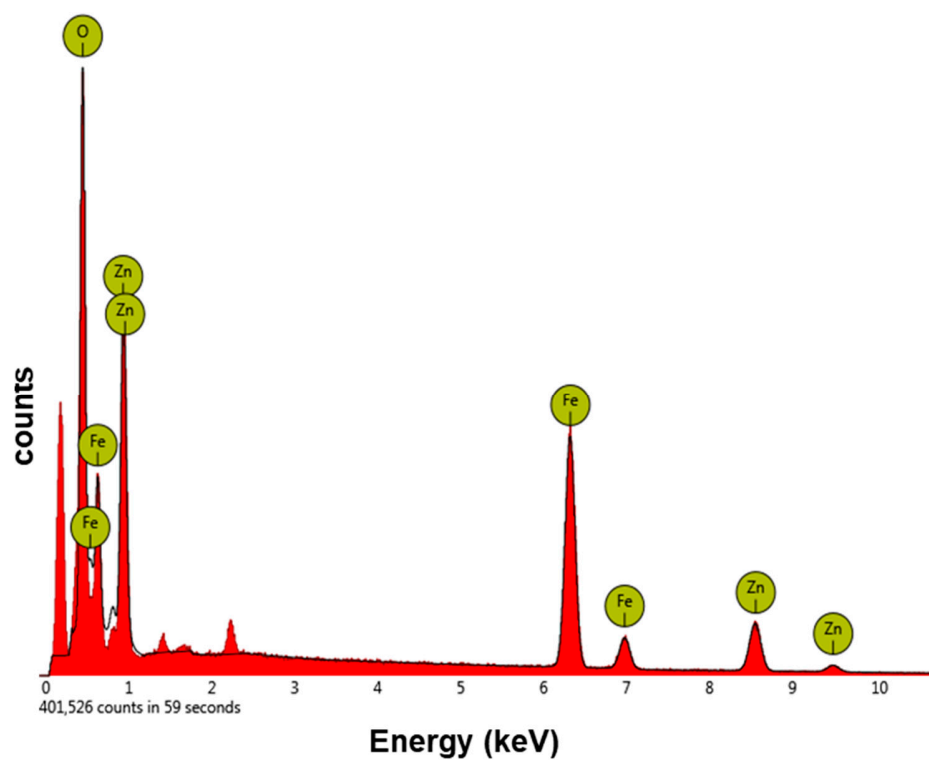

**Figure S2.** EDX spectrum of ZnO/Fe<sub>2</sub>O<sub>3</sub> NFs.

**Table S1** The elemental composition of Zn, O, and Fe in the ZnO/ Fe<sub>2</sub>O<sub>3</sub> NFs.

| Element<br>Symbol | Element<br>Name | Weight<br>Conc. |
|-------------------|-----------------|-----------------|
| O                 | Oxygen          | 30.88           |
| Fe                | Iron            | 42.01           |
| Zn                | Zinc            | 27.11           |

**Table S2.** Comparison in degradation efficiency of MB and MO dyes using the ZnO/Fe<sub>2</sub>O<sub>3</sub> NFs as electrocatalysts with other catalysts.

| composite                                    | Light   | Dyes |    | Irradiation<br>time(min) | Percent<br>Degradation | Ref          |
|----------------------------------------------|---------|------|----|--------------------------|------------------------|--------------|
|                                              |         | MB   | MO |                          |                        |              |
| ZnO/Fe <sub>2</sub> O <sub>3</sub>           | UV      | /    | MO | 140 min                  | 70%                    | 1            |
| ZnO/Fe <sub>2</sub> O <sub>3</sub>           | Visible | MB   | MO | 50 and 80 min            | 95 and 82.5%           | 2            |
| ZnO-modified g-C <sub>3</sub> N <sub>4</sub> | 200W    | MB   | /  | 120 min                  | 90%                    | 3            |
| ZnO/MOS <sub>2</sub>                         | UV-vis  | MB   | /  | 80 min                   | 81%                    | 4            |
| Cu-ZnO/S-gC <sub>3</sub> N <sub>4</sub>      | UV      | MB   | /  | 90 min                   | 93%                    | 5            |
| Ag/ZnO                                       | UV      | MB   | /  | 60 min                   | 60%                    | 6            |
| ZnO/Cu <sub>2</sub> O                        | UV      | /    | MO | 180 min                  | 73%                    | 7            |
| ZnO/SnO <sub>2</sub>                         | UV      | /    | MO | 100 min                  | 56%                    | 8            |
| ZnO/Eu                                       | Sun     | /    | MO | 150 min                  | 62%                    | 9            |
| Graphene/ZnO                                 | Sun     | /    | MO | 360 min                  | 96%                    | 10           |
| ZnO/Fe <sub>2</sub> O <sub>3</sub> NFs       | UV      | MB   | MO | 90 and 150<br>min        | 100 and 96%            | This<br>work |

**Table S3** Values of  $k$  for MB and MO dyes using different photocatalysts

| Dyes | Sample                 | ZnO    | Fe <sub>2</sub> O <sub>3</sub> | ZnO/Fe <sub>2</sub> O <sub>3</sub> |
|------|------------------------|--------|--------------------------------|------------------------------------|
| MB   | $k \text{ (min)}^{-1}$ | 0.0109 | 0.015                          | 0.034                              |
| MO   | $k \text{ (min)}^{-1}$ | 0.006  | 0.0095                         | 0.024                              |

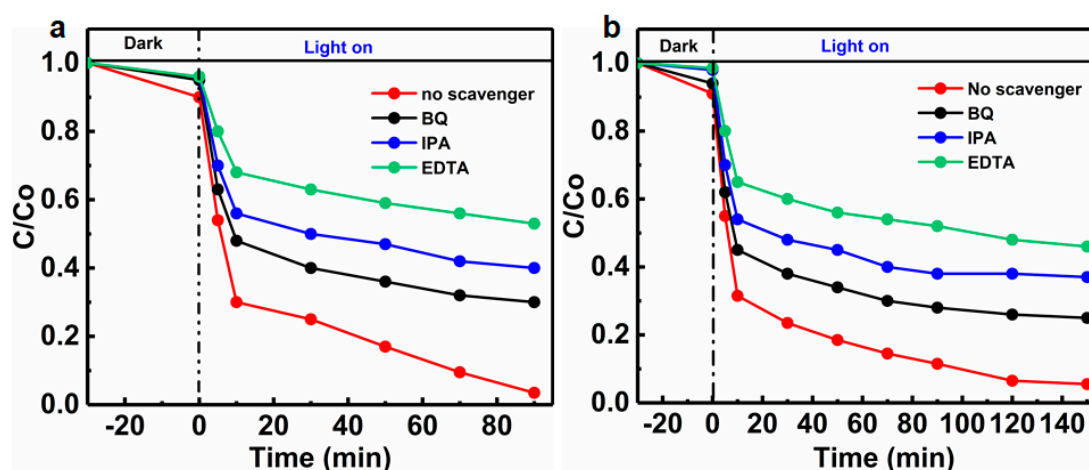

**Figure S3.** Active species trapping experiments using the ZnO/Fe<sub>2</sub>O<sub>3</sub> NFs as the photocatalyst under UV light irradiation: (a) MB (1 mg L<sup>-1</sup>) and (b) MO (1 mg L<sup>-1</sup>).

## References

1. Yan, W.; Fan, H.; Yang, C. Ultra-fast synthesis and enhanced photocatalytic properties of alpha Fe<sub>2</sub>O<sub>3</sub>/ZnO core-shell structure, *Mater. Lett.* 2011, 65, 11, 1595–1597
2. Liu, Y.; Yu, L.; Hu, Y.; Guo, C.; Zhang, F.; Lou, X. W. D. A magnetically separable photocatalyst based on nest-like  $\gamma$ -Fe<sub>2</sub>O<sub>3</sub>/ZnO double-shelled hollow structures with enhanced photocatalytic activity, *Nanoscale* 2012, 4, 1, 183–187.
3. Paul, DR.; Gautam, S.; Panchal, P.; Nehra, SP.; Choudhary, P.; Sharma, A. ZnO-Modified g-C<sub>3</sub>N<sub>4</sub>: A Potential Photocatalyst for Environmental Application. *ACS Omega*. 2020, 5, 8, 3828–3838.
4. Krishnan, U.; Kaur, M.; Kaur, G.; Singh, K.; Dogra, AR.; Kumar, M.; Kumar, A. MoS<sub>2</sub>/ZnO nanocomposites for efficient photocatalytic degradation of industrial pollutants, *Mater. Res. Bull.* 2019, 111, 212–221.
5. Javed, M.; Qamar, MA.; Shahid, S.; Alsaab, H.; Asif, S. Highly efficient visible light active Cu ZnO/S-gC<sub>3</sub>N<sub>4</sub> nanocomposites for efficient photocatalytic degradation of organic pollutants, *RSC Adv.*, 2021, 11, 59, 37254–37267.
6. Height, M.J.; Pratsinis, S.E.; Mekasuwandumrong, O.; Praserttham, P. Ag-ZnO catalysts for UV photodegradation of methylene blue, *Appl. Catal. B*, 2006, 63, 3–4, 305–312.
7. Xu, C.; Cao, L.; Su, G.; Liu, W.; Liu, H.; Yu, Y.; Qu, X. Preparation of ZnO/Cu<sub>2</sub>O compound photocatalyst and application in treating organic dyes. *J. Hazard. Mater.* 2010, 176, 1–3, 807–813.

8. Ali, W.; Ullah, H.; Zada, A.; Alamgir, M.K.; Muhammad, W.; Ahmad, M.J.; Nadhman, A. Effect of calcination temperature on the photoactivities of ZnO/SnO<sub>2</sub> nanocomposites for the degradation of methyl orange. *Mater. Chem. Phys.* 2018, 213, 259-266.
9. Trandafilović, LV.; Jovanović, DJ.; Zhang, X.; Ptasińska, S.; Dramićanin, M. Enhanced photocatalytic degradation of methylene blue and methyl orange by ZnO: Eu nanoparticles. *Appl. Catal. B*, 2017, 203, 740-752.
10. Hao, C.; Yang, Y.; Shen, Y.; Feng, F.; Wang, X.; Zhao, Y.; Ge, C. Liquid phase-based ultrasonic-assisted synthesis of G-ZnO nanocomposites and its sunlight photocatalytic activity. *Mater. Des.* 2016, 89, 864-871.
